# Supplementary material for: Regulatory fine-tuning of mcr-1 increases bacterial fitness and stabilises antibiotic resistance in agricultural settings
Source: PubMed Central journal article supplement (PMC10579358; doi:10.1038/s41396-023-01509-7), 2023-09-18
Supplement: 41396_2023_1509_MOESM1_ESM.pdf [file 41396_2023_1509_MOESM1_ESM.pdf]

## Supplementary Material

### Tables

| Variant Name | Location                | Variant Prevalence in Dataset |      |              |             |             |             | Sequence                                                                                                               |
|--------------|-------------------------|-------------------------------|------|--------------|-------------|-------------|-------------|------------------------------------------------------------------------------------------------------------------------|
|              |                         | All Datasets                  | Wang | Shen (Total) | Shen (2016) | Shen (2017) | Shen (2018) |                                                                                                                        |
| Consensus    | NA                      | 521                           | 225  | 268          | 150         | 90          | 29          | TTGTA <b>CTGGATTTC</b> CTTAAAAAATTCAGTATAATTG<br>CCGCAATTATCCCACCGTTTATTTTTGAGTAGTTTC<br>TC                            |
| PV1          | -10 promoter box        | 78                            | 63   | 14           | 4           | 7           | 3           | TTGTA <b>CTGGATTTC</b> CTTAAAAAATTCAGTAA <b>A</b> AATTG<br>CCGCAATTATCCCACCGTTTATTTTTGAGTAGTTTC<br>TC                  |
| PV2          | -10 promoter box        | 32                            | 14   | 18           | 7           | 8           | 3           | TTGTA <b>CTGGATTTC</b> TAAAAAATTCAGTAA <b>G</b> AATTG<br>CCGCAATTATCCCACCGTTTATTTTTGAGTAGTTTC<br>TC                    |
| PV3          | -10 promoter box        | 231                           | 31   | 200          | 57          | 81          | 29          | TTGTA <b>CTGGATTTC</b> CTTAAAAAATTCAGTAT <b>G</b> AATTG<br>CCGCAATTATCCCACCGTTTATTTTTGAGTAGTTTC<br>TC                  |
| PV4          | -10 promoter box        | 2                             | 2    | 0            | 0           | 0           | 0           | TTGTA <b>CTGGATTTC</b> CTTAAAAAATTCAGTATA <b>G</b> TTG<br>CCGCAATTATCCCACCGTTTATTTTTGAGTAGTTTC<br>TC                   |
| SDV1         | Shine-Dalgarno          | 22                            | 19   | 3            | 0           | 2           | 1           | TTGTA <b>CTGGATTTC</b> CTTAAAAAATTCAGTATAATTG<br>CCGCAATTATCCCACCGTTTATTTTT <b>G</b> A <b>I</b> TAGTTTC<br>TC          |
| SDV2         | Shine-Dalgarno          | 142                           | 41   | 93           | 45          | 35          | 13          | TTGTA <b>CTGGATTTC</b> CTTAAAAAATTCAGTATAATTG<br>CCGCAATTATCCCACCGTTTATTTTT <b>I</b> A <b>A</b> TAGTTTC<br>TC          |
| SDV3         | Shine-Dalgarno          | 38                            | 22   | 16           | 4           | 10          | 2           | TTGTA <b>CTGGATTTC</b> CTTAAAAAATTCAGTATAATTG<br>CCGCAATTATCCCACCGTTTATTTTT <b>G</b> A <b>A</b> TAGTTTC<br>TC          |
| SDV4         | Shine-Dalgarno          | 8                             | 5    | 3            | 1           | 1           | 1           | TTGTA <b>CTGGATTTC</b> CTTAAAAAATTCAGTATAATTG<br>CCGCAATTATCCCACCGTTTATTTTT <b>G</b> C <b>T</b> AGTTTC<br>TC           |
| SNP1         | From Mid to SD          | 58                            | 27   | 31           | 15          | 14          | 2           | TTGTA <b>CTGGATTTC</b> CTTAAAAAATTCAGTATAATTG<br>CC <b>A</b> CAATTATCCCACCGTTTATTTTT <b>G</b> A <b>I</b> TAGTTTC<br>TC |
| SNP2         | Mid: Between -10 and SD | 14                            | 6    | 8            | 2           | 4           | 2           | TTGTA <b>CTGGATTTC</b> CTTAAAAAATTCAGTATAATTG<br>CCGCAATTAT <b>A</b> CCACCGTTTATTTTTGAGTAGTTTC<br>TC                   |
| SNP3         | Mid: Between -10 and SD | 2                             | 2    | 0            | 0           | 0           | 0           | TTGTA <b>CTGGATTTC</b> CTTAAAAAATTCAGTATAATTG<br>CC <b>G</b> I <b>A</b> AATTATCCCACCGTTTATTTTTGAGTAGTTTC<br>TC         |
| SNP4         | Mid: Between -10 and SD | 4                             | 3    | 1            | 0           | 1           | 0           | TTGTA <b>CTGGATTTC</b> CTTAAAAAATTCAGTATAATTG<br>CCGCAATTATCCC <b>G</b> CCGTTTATTTTTGAGTAGTTTC<br>TC                   |
| SNP5         | Shine-Dalgarno          | 1                             | 0    | 1            | 0           | 1           | 0           | TTGTA <b>CTGGATTTC</b> CTTAAAAAATTCAGTATAATTG<br>CCGCAATTATCCCACCGTTTATTTTT <b>A</b> AGTAGTTTC<br>TC                   |
| SNP6         | Mid: Between -10 and SD | 5                             | 0    | 5            | 3           | 2           | 0           | TTGTA <b>CTGGATTTC</b> CTTAAAAAATTCAGTATAATTG<br>CCGCAATTAT <b>C</b> ACCGTTTATTTTTGAGTAGTTTC<br>TC                     |
| SNP7         | -35 promoter box        | 13                            | 6    | 6            | 0           | 4           | 2           | TTGTA <b>CTG</b> A <b>A</b> TTTCCTTAAAAAATTCAGTATAATTG<br>CCGCAATTATCCCACCGTTTATTTTTGAGTAGTTTC<br>TC                   |
| SNP8         | -35 promoter box        | 4                             | 2    | 2            | 0           | 2           | 0           | <b>C</b> TGTA <b>CTGGATTTC</b> CTTAAAAAATTCAGTATAATTG<br>CCGCAATTATCCCACCGTTTATTTTTGAGTAGTTCT<br>C                     |

**Supplementary table 1:** Counts of consensus and variant sequences in Shen and Wang datasets. Variant sequences are listed with variants highlighted (blue) in bold underline.

| <b>Regulatory Variant</b> | <b>Promoter Assessments</b> |                  |                  |                                                    | <b>Shine-Dalgarno Assessments</b>               |                                                                      |
|---------------------------|-----------------------------|------------------|------------------|----------------------------------------------------|-------------------------------------------------|----------------------------------------------------------------------|
|                           | BacPP Score (100)           | BacPP Score (75) | BacPP Score (25) | DeNovoDNA Transcription Initiation Rate (au) (100) | DeNovoDNA Translation Initiation Rate (au) (35) | DeNovoDNA Translation Initiation Rate (au) (45 + full <i>mcr-1</i> ) |
| <i>Consensus</i>          | <b>72.375</b>               | <b>86</b>        | <b>40</b>        | <b>7419.839125</b>                                 | <b>832.0925053</b>                              | <b>708.14</b>                                                        |
| <i>PV1</i>                | 69.5625                     | 81               | 45               | 5311.77532                                         | -                                               | -                                                                    |
| <i>PV2</i>                | 67.5625                     | 77               | 36               | 4313.308475                                        | -                                               | -                                                                    |
| <i>PV3</i>                | 70.4375                     | 77               | 31               | 4204.091093                                        | -                                               | -                                                                    |
| <i>PV4</i>                | 69.0625                     | 77               | 31               | 4788.265912                                        | -                                               | -                                                                    |
| <i>SDV1</i>               | -                           | -                | -                | -                                                  | 526.1665373                                     | 526.17                                                               |
| <i>SDV2</i>               | -                           | -                | -                | -                                                  | 526.1665373                                     | 526.17                                                               |
| <i>SDV3</i>               | -                           | -                | -                | -                                                  | 526.1665373                                     | 526.17                                                               |
| <i>SDV4</i>               | -                           | -                | -                | -                                                  | 253.7995844                                     | 145.25                                                               |

**Supplementary table 2:** Scores obtained for promoter and Shine-Dalgarno using In-Silico analysis. Numbers in brackets indicate query length (in base pairs).

| Plasmid                        | Relevant features                                              | Source/Reference         |
|--------------------------------|----------------------------------------------------------------|--------------------------|
| pSEVA121                       | AmpR, OriT+                                                    | SEVA material repository |
| pn16                           | <i>mcr-1</i> +, IncI2 plasmid                                  | <sup>27</sup>            |
| pSEVA121: <i>mcr-1</i>         | consensus <i>mcr-1</i> sequence, consensus regulatory sequence | this study               |
| pSEVA121:inactive <i>mcr-1</i> | (T285A) <i>mcr-1</i> in pSEVA121                               | this study               |
| pSEVA121:PV1                   | <i>mcr-1.1</i> + promoter variant 1 + unique tag               | this study               |
| pSEVA121:PV2                   | <i>mcr-1.1</i> + promoter variant 2 + unique tag               | this study               |
| pSEVA121:PV3                   | <i>mcr-1.1</i> + promoter variant 3 + unique tag               | this study               |
| pSEVA121:PV4                   | <i>mcr-1.1</i> + promoter variant 4 + unique tag               | this study               |
| pSEVA121:SDV1                  | <i>mcr-1.1</i> + shine-delgarno variant 1 + unique tag         | this study               |
| pSEVA121:SDV2                  | <i>mcr-1.1</i> + shine-delgarno variant 2 + unique tag         | this study               |
| pSEVA121:SDV3                  | <i>mcr-1.1</i> + shine-delgarno variant 3 + unique tag         | this study               |
| pSEVA121:SDV4                  | <i>mcr-1.1</i> + shine-delgarno variant 4 + unique tag         | this study               |

**Supplementary table 3:** List of plasmids used/created in this study

| Primer        | Length (bp) | Sequence (5'→3')                                        | Primer Use                          |
|---------------|-------------|---------------------------------------------------------|-------------------------------------|
| p16_F         | 38          | GATAACAATTTACACAGGAGGATTGCGCAATGATTGC                   | <i>mcr-1</i> amplification          |
| p16_R         | 41          | AGGGTTTTCCAGTCACGACCATAATACGAATGGAGTGTGC                | <i>mcr-1</i> amplification          |
| pSEVA_F       | 21          | GTCGTGACTGGGAAAACCTG                                    | pSEVA121 amplification              |
| pSEVA_R       | 24          | TCCTGTGTGAAATTGTTATCCGCT                                | pSEVA121 amplification              |
| MisoInF       | 38          | CGTGCGGCACATCGGCGGCGTATTCTGTGCCGTGTATG                  | <i>mcr-1</i> inactivation           |
| MisoInR       | 38          | CATACACGGCACAGAATACGCCCGCATGTGCCGCACG                   | <i>mcr-1</i> inactivation           |
| Gibson_F      | 39          | GCTTCTACGTGGCTGCCATTTTTGGGGTGAGGCCGTTC                  | Regulatory variant SNP substitution |
| MisoPV1F      | 51          | GTACTGGATTCTTAAAAAATTGCAGTAAAATTGCCGCAATTATC<br>CCACCG  | Regulatory variant SNP substitution |
| MisoPV1R      | 51          | CGGTGGGATAATTGCGGCAATTTACTGCAATTTTTTAAGAAATC<br>CAGTAC  | Regulatory variant SNP substitution |
| MisoPV2F      | 51          | GTACTGGATTCTTAAAAAATTGCAGTAGAATTGCCGCAATTATC<br>CCACCG  | Regulatory variant SNP substitution |
| MisoPV2R      | 51          | CGGTGGGATAATTGCGGCAATTTACTGCAATTTTTTAAGAAATC<br>CAGTAC  | Regulatory variant SNP substitution |
| MisoPV3F      | 51          | GTACTGGATTCTTAAAAAATTGCAGTATGATTGCCGCAATTATC<br>CCACCG  | Regulatory variant SNP substitution |
| MisoPV3R      | 51          | CGGTGGGATAATTGCGGCAATCATACTGCAATTTTTTAAGAAATC<br>CAGTAC | Regulatory variant SNP substitution |
| MisoPV4F      | 51          | GTACTGGATTCTTAAAAAATTGCAGTATAGTTGCCGCAATTATC<br>CCACCG  | Regulatory variant SNP substitution |
| MisoPV4R      | 51          | CGGTGGGATAATTGCGGCAACTATACTGCAATTTTTTAAGAAATC<br>CAGTAC | Regulatory variant SNP substitution |
| MisoSDV1<br>F | 50          | GCCGCAATTATCCCACCGTTTATTTTTGATTAGTTTCTCATGATG<br>CAGC   | Regulatory variant SNP substitution |
| MisoSDV1<br>R | 50          | GCTGCATCATGAGAACTAATCAAAAAATAAACGGTGGGATAAT<br>TGCGGC   | Regulatory variant SNP substitution |
| MisoSDV2<br>F | 50          | GCCGCAATTATCCCACCGTTTATTTTTTAATAGTTTCTCATGATG<br>CAGC   | Regulatory variant SNP substitution |
| MisoSDV2<br>R | 50          | GCTGCATCATGAGAACTATTAAAAAATAAACGGTGGGATAAT<br>TGCGGC    | Regulatory variant SNP substitution |
| MisoSDV3<br>F | 50          | GCCGCAATTATCCCACCGTTTATTTTTGAATAGTTTCTCATGATG<br>CAGC   | Regulatory variant SNP substitution |
| MisoSDV3<br>R | 50          | GCTGCATCATGAGAACTATTCAAAAAATAAACGGTGGGATAAT<br>TGCGGC   | Regulatory variant SNP substitution |
| MisoSDV4<br>F | 50          | GCCGCAATTATCCCACCGTTTATTTTTGCGTAGTTTCTCATGATG<br>CAGC   | Regulatory variant SNP substitution |
| MisoSDV4<br>R | 50          | GCTGCATCATGAGAACTACGCAAAAAATAAACGGTGGGATAAT<br>TGCGGC   | Regulatory variant SNP substitution |
| Tlwt_F        | 37          | TAGAATGGTCGACGTCGTGACTGGGAAAACCTG                       | Unique sequence tag insertion       |
| Tlwt_R        | 37          | CACTTCGCGATTGAGTCATAATACGAATGGAGTGTGC                   | Unique sequence tag insertion       |
| Tlin_F        | 37          | GCCTGCGATATACCGTGTGCTGACTGGGAAAACCTG                    | Unique sequence tag insertion       |
| Tlin_R        | 37          | TTATCTTACCGACTGCATAATACGAATGGAGTGTGC                    | Unique sequence tag insertion       |
| Tlvp1_F       | 37          | CGCATGGACACTATTAGTCGTGACTGGGAAAACCTG                    | Unique sequence tag insertion       |
| Tlvp1_R       | 37          | AGCGCTCCAGGTCAATCATAATACGAATGGAGTGTGC                   | Unique sequence tag insertion       |
| Tlvp2_F       | 37          | GTCTAATCAGCGACAGGTCGTGACTGGGAAAACCTG                    | Unique sequence tag insertion       |
| Tlvp2_R       | 37          | TGACTGCGTACTCTGACATAATACGAATGGAGTGTGC                   | Unique sequence tag insertion       |
| Tlvp3_F       | 37          | AGGAATCATTCGTTCCGTCGTGACTGGGAAAACCTG                    | Unique sequence tag insertion       |
| Tlvp3_R       | 37          | CATCTCGAATGCTGGTCATAATACGAATGGAGTGTGC                   | Unique sequence tag insertion       |
| Tlvp4_F       | 37          | CTGGCAACGCAGTCAGGTCGTGACTGGGAAAACCTG                    | Unique sequence tag insertion       |
| Tlvp4_R       | 37          | ATCGAGGTAAGGATAACATAATACGAATGGAGTGTGC                   | Unique sequence tag insertion       |

|           |    |                                          |                                   |
|-----------|----|------------------------------------------|-----------------------------------|
| TIsdv1_F  | 37 | CCTGAGCAGCCTGATCGTCGTGACTGGGAAAACCCCTG   | Unique sequence tag insertion     |
| TIsdv1_R  | 37 | ATGCACTACTCCTAATCATAATACGAATGGAGTGTGC    | Unique sequence tag insertion     |
| TIsdv2_F  | 37 | TGATCGACCGAGAGCTGTCGTGACTGGGAAAACCCCTG   | Unique sequence tag insertion     |
| TIsdv2_R  | 37 | GCCGTAATTTAGAGTCCATAATACGAATGGAGTGTGC    | Unique sequence tag insertion     |
| TIsdv3_F  | 37 | ATATGTGGTGCAGCCAGTCGTGACTGGGAAAACCCCTG   | Unique sequence tag insertion     |
| TIsdv3_R  | 37 | TATCAGGCGACATGAGCATAATACGAATGGAGTGTGC    | Unique sequence tag insertion     |
| TIsdv4_F  | 37 | TGAGAGTCGCAACTGTGTGTCGTGACTGGGAAAACCCCTG | Unique sequence tag insertion     |
| TIsdv4_R  | 37 | GAAGGTTGTTCCAACCCATAATACGAATGGAGTGTGC    | Unique sequence tag insertion     |
| tWT       | 32 | ACTCAATCGCGAAGTGTAGAATGGTCGACGTC         | primers for variant specific qPCR |
| tInactive | 32 | CAGTCCGGTAAGATAAGCCTGCGATATACCGT         | primers for variant specific qPCR |
| tPV1      | 32 | ATTGACCTGGAGCGCTCGCATGGACACTATTA         | primers for variant specific qPCR |
| tPV2      | 32 | TCAGAGTACGCAGTCAGTCTAATCAGCGACAG         | primers for variant specific qPCR |
| tPV3      | 32 | ACCAGCATTTCGAGATGAGGAATCATTCCGGTCC       | primers for variant specific qPCR |
| tPV4      | 32 | TTATCCTTACCTCGATCTGGCAACGCAGTCAG         | primers for variant specific qPCR |
| tSDV1     | 32 | ATTAGGAGTAGTGCATCCTGAGCAGCCTGATC         | primers for variant specific qPCR |
| tSDV2     | 32 | GACTCTAAATTACGGCTGATCGACCGAGAGCT         | primers for variant specific qPCR |
| tSDV3     | 32 | CTCATGTGCCTGATAATATGTGGTGCAGCCA          | primers for variant specific qPCR |
| tSDV4     | 32 | GGTTGGAACAACCTTCTGAGAGTCGCAACTGT         | primers for variant specific qPCR |
| qPCR_rev  | 30 | CAACCGAGCGTTCTGAACAAATCCAGATGG           | primers for variant specific qPCR |
| RTmer_F   | 22 | CCACAGCTTGCCAAGATCGATG                   | RT-qpcr expression primers        |
| RTmer_R   | 22 | ATACTCATCCGCGCCAGATAG                    | RT-qpcr expression primers        |
| RTtrf_aF  | 22 | GTGCGAGCTGAAATAGTCGAAC                   | RT-qpcr expression primers        |
| RTtrfaF_R | 22 | GAGGAAATCGTCGTGCTGTTTG                   | RT-qpcr expression primers        |

**Supplementary table 4:** List of primers created and used in this study

**Supplementary Table 5 – Statistical tables**

```
Type II ANOVA (Fitness ~ Variant * Colistin Concentration)
              Df      Sum Sq   Mean Sq   F value   Pr(>F)
Variant      7      1.9362    0.2766    15.332    1.84e-14 ***
Colistin
Concentration 3      1.0823    0.3608    19.997    1.08e-10 ***
Variant:
Colistin      21      0.1676    0.0080    0.443     0.983
Concentration
Residuals    128      2.3092    0.0180
---
Significance codes:  0 '***' 0.001 '**' 0.01 '*' 0.05 '.' 0.1 ' ' 1
```

**Linear Models**

**lm(formula = Fitness ~ Expression)**

```
Residuals:
      Min       1Q   Median       3Q      Max
-0.093462 -0.065028  0.008597  0.052829  0.100424
Coefficients:
              Estimate   Std. Error  t value    Pr(>|t|)
(Intercept)  1.41571     0.07779   18.199    3.74e-07 **
Expression   -0.33324     0.08675   -3.841    0.00636 **
Significance codes:  0 '***' 0.001 '**' 0.01 '*' 0.05 '.' 0.1 ' ' 1
Residual standard error: 0.07878 on 7 degrees of freedom
Multiple R-squared:  0.6782,    Adjusted R-squared:  0.6323
F-statistic: 14.76 on 1 and 7 DF,  p-value: 0.006364
```

**lm(formula = Fitness ~ IC\_50)**

```
Residuals:
      Min       1Q   Median       3Q      Max
-0.15305 -0.03515  0.00170  0.02978  0.11221
Coefficients:
              Estimate   Std. Error  t value    Pr(>|t|)
(Intercept)  0.73848     0.11335    6.515    0.000329 ***
IC_50        0.27384     0.07606    3.600    0.008738 **
Significance codes:  0 '***' 0.001 '**' 0.01 '*' 0.05 '.' 0.1 ' ' 1
Residual standard error: 0.08224 on 7 degrees of freedom
Multiple R-squared:  0.6493,    Adjusted R-squared:  0.5992
F-statistic: 12.96 on 1 and 7 DF,  p-value: 0.008738
```

**lm(formula = Fitness ~ Mean Surface Charge)**

```
Residuals:
      Min       1Q   Median       3Q      Max
-0.159388 -0.059606  0.000191  0.034426  0.238717
Coefficients:
```

|                        | Estimate | Std.<br>Error | t<br>value | Pr(> t ) |
|------------------------|----------|---------------|------------|----------|
| (Intercept)            | 0.8253   | 0.3527        | 2.340      | 0.0519   |
| Mean Surface<br>Charge | 0.3949   | 0.4471        | 0.883      | 0.4064   |

---

Significance codes: 0 '\*\*\*' 0.001 '\*\*' 0.01 '\*' 0.05 '.' 0.1 ' ' 1  
Residual standard error: 0.1317 on 7 degrees of freedom  
Multiple R-squared: 0.1003, Adjusted R-squared: -0.02827  
F-statistic: 0.78 on 1 and 7 DF, p-value: 0.4064

## Figures

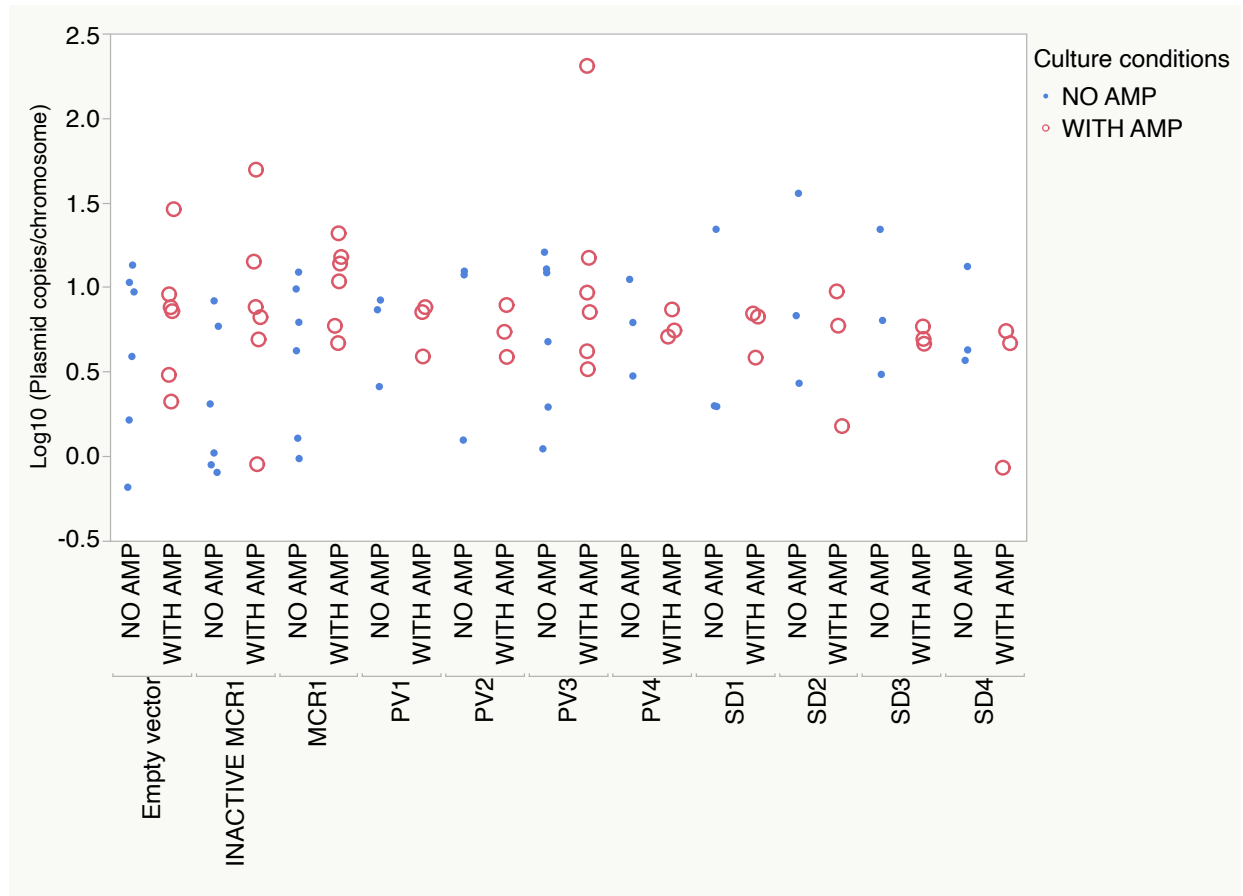

**Figure S1. Plasmid stability.** Independent colonies of strains used in this study were inoculated into MH+ampicillin (n=3 or n=6 per strain). After overnight incubation, pre-cultures were diluted to an initial titre of approximately  $10^5$  CFU/mL in MH and MH+ampicillin. Plasmid copy number was determined by qPCR using primers for the pSEVA plasmid (trfA; primers RTtrf\_aF, RTtrfaF\_R) or a chromosomal control (16S; primers ECfwd, ECrev). qPCR methods were as described in the main text and primer sequences are given in supplementary table 4. No template controls gave high CT values (>30) and all CT values for samples fell within the range covered by standard curves for both primer pairs. Both primer sets gave an amplification efficiency of 100%, allowing us to calculate plasmid copy number as  $2^{(CT_{\text{Chromosomal control}} - CT_{\text{Plasmid}})} \times 7$  (16S rRNA copies/chromosome). Plasmid copy number estimates were normalized with a  $\log_{10}$  transformation, and we used a 2-way ANOVA to test the impact of strain and culture condition on copy number. Plasmid copy number did not vary between strains ( $F_{10,68}=.41$ ,  $P=.94$ ), culture conditions ( $F_{1,68}=.63$ ,  $P=.43$ ), or due to the interaction between strain and culture condition ( $F_{10,68}=.88$ ,  $P=.56$ ). Our overall estimate of pSEVA copy number is 5.58 plasmids/chromosome (95% c.i.: 6.76-4.46).



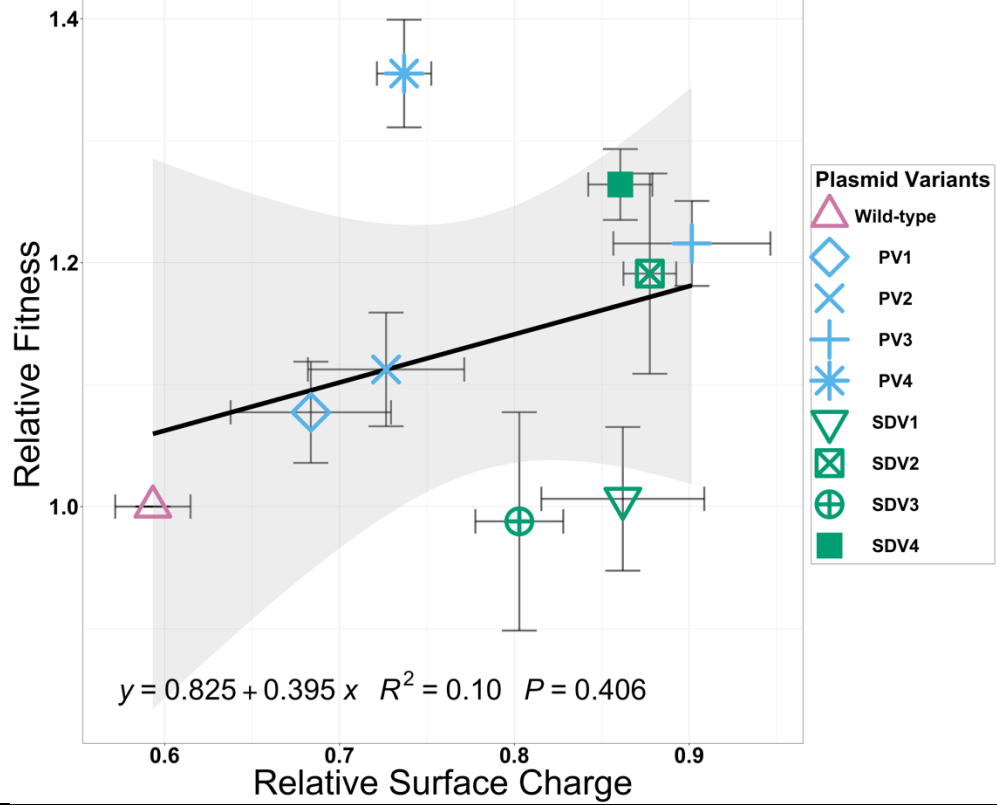

**Supplementary Figure S2:** Scatterplot showing relationships between relative fitness (y-axis) and relative surface charge (x-axis) of regulatory variants and controls. Points assigned to variants/controls are shown in the legend (error bars = SE). Blank lines show linear regression model fitted to the data with confidence intervals in grey shading. Regression line equations, model r-squared and p-values indicated in black text.

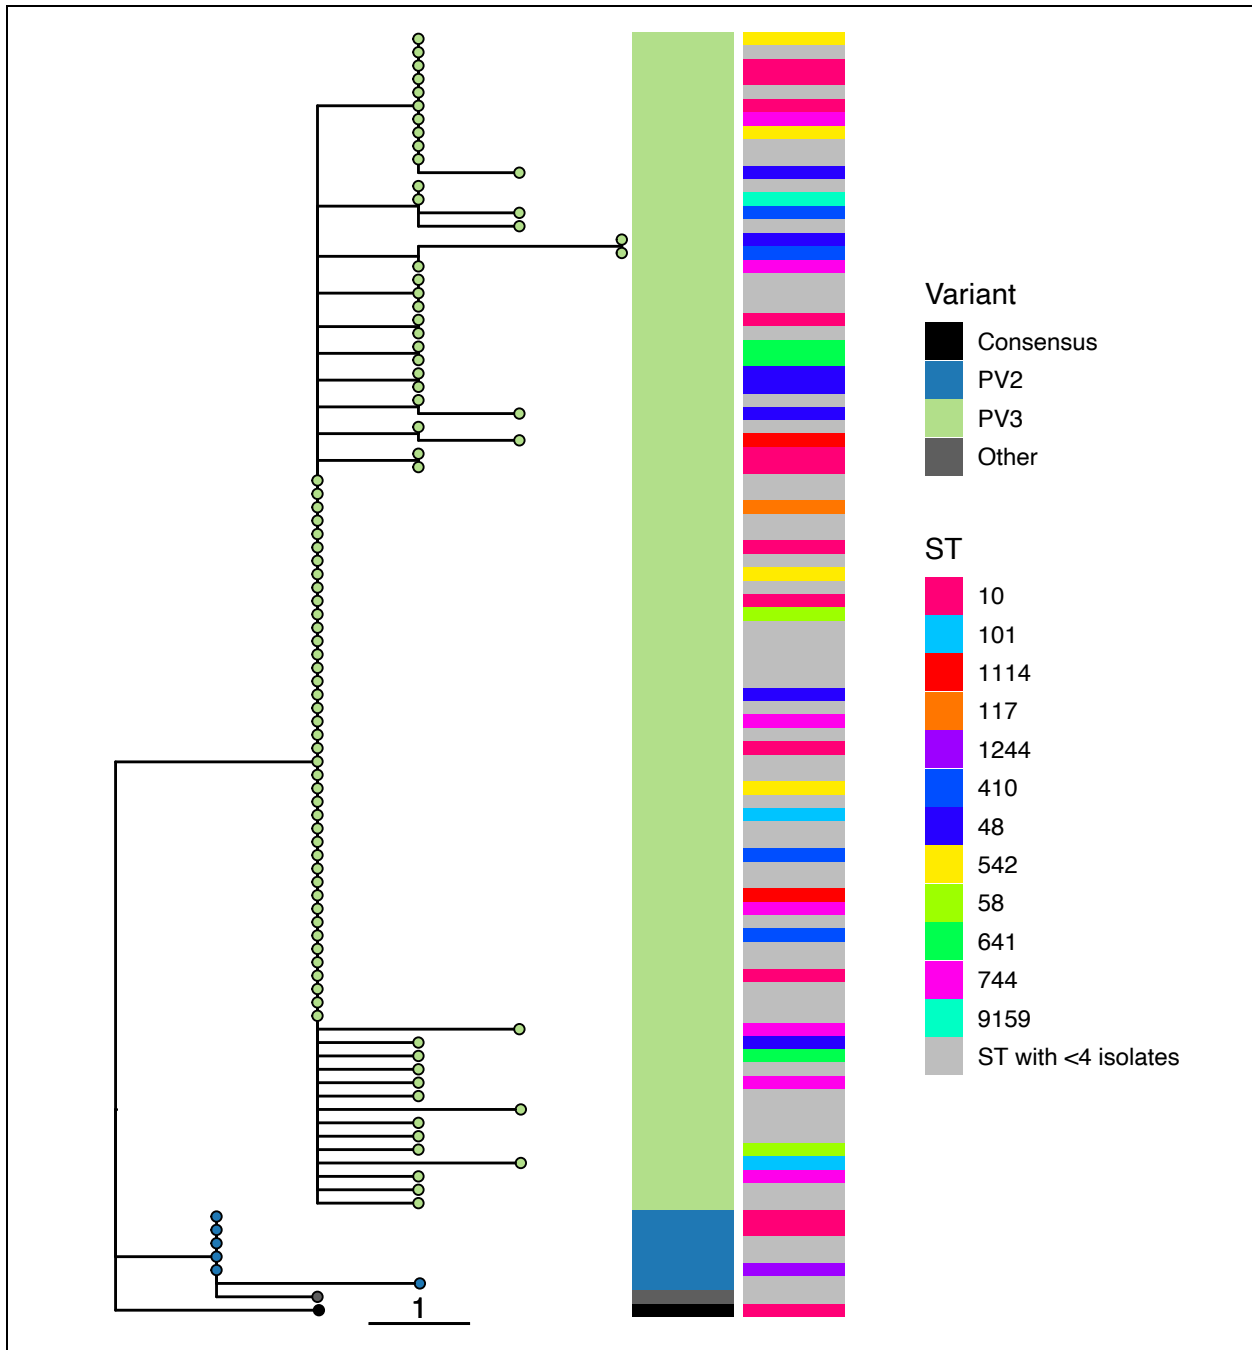

**Supplementary Figure S3.** A reference-based phylogeny of IncX4 plasmids as in Figure 5C but restricting to only those sampled in 2016. This proves that regulatory variant clades were already present before the colistin ban. Tip colour and first column show regulatory variant, second column shows ST (STs with <4 IncX4 plasmids in the whole dataset are coloured grey; colours as in Figure 5C).

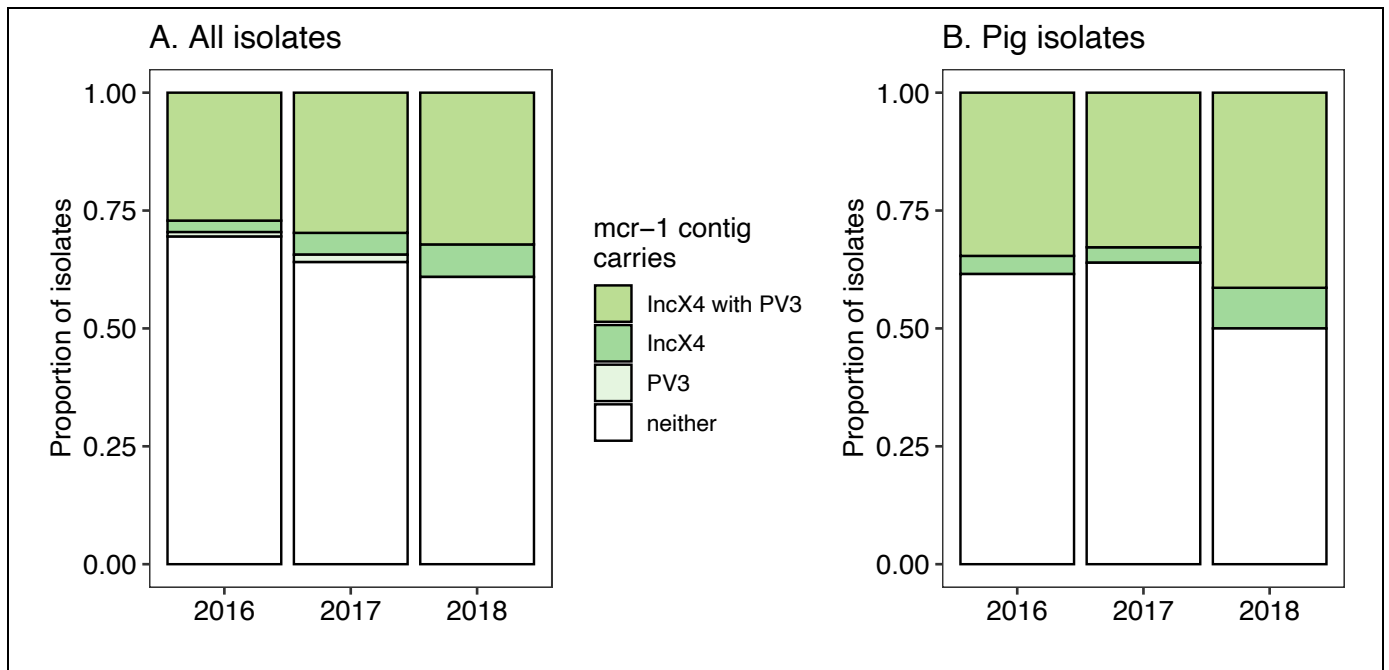

**Supplementary Figure S4:** Increase in proportion of isolates carrying an IncX4 plasmid with PV3 from a genomic dataset of *mcr-1+* isolates collected pre- and post-colistin ban. **A)** All isolates where the de novo assembly had an *mcr-1*-carrying contig (n=674). **B)** The subset of those isolates which were collected from pigs (n=197). Isolates are grouped by whether the *mcr-1*-carrying contig had a single IncX4 replicon and/or the PV3 regulatory mutation. Contigs with IncX4 and other replicons were not included within “IncX4”, because we are interested in the spread of plasmids similar to the reference plasmid which carries only IncX4.

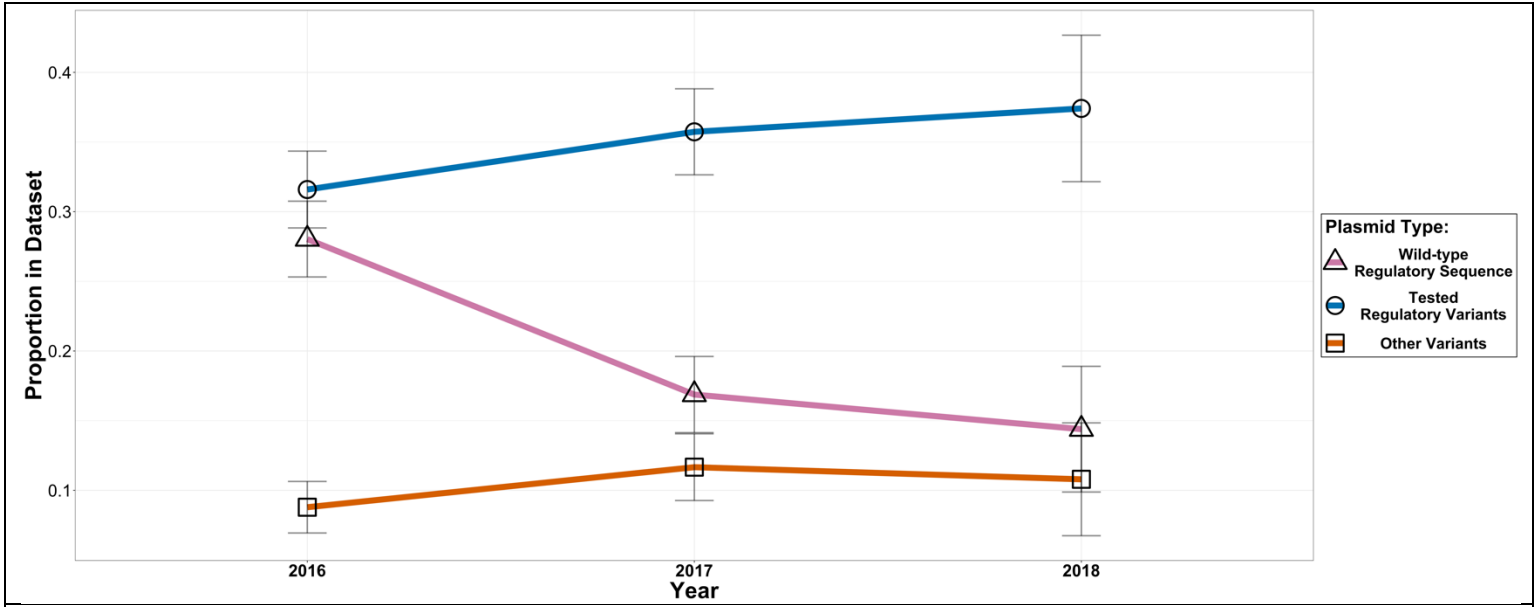

**Supplementary Figure S5:** Proportion of WT (pink) tested variants (blue) and other (green) regulatory variant sequences in Shen dataset as separated by year. Error bars show the standard error of proportions.
